# Supplementary material for: Using systematic reviews to inform NIHR HTA trial planning and design: a retrospective cohort
Source: PubMed Central journal article supplement (PMC4696153; doi:10.1186/s12874-015-0102-2), 2015-12-29
Supplement: 12874_2015_102_MOESM1_ESM.pdf [file 12874_2015_102_MOESM1_ESM.pdf]

1 **Additional file 1 - Criteria for use of systematic reviews to inform trial design**

|                                                              |                                                                                                                                                                                             |
|--------------------------------------------------------------|---------------------------------------------------------------------------------------------------------------------------------------------------------------------------------------------|
| Justification of treatment comparison                        | If the review identified gap in the evidence or few smaller studies identified need for a trial.                                                                                            |
| Selection of definition or outcome                           | If the outcome or a measure for an outcome specified in the review was used in the trial and was justified for doing so.                                                                    |
| Recruitment and consent                                      | If the review justified the case for continuing recruitment or provided information on recruitment rates, difficulties etc. which has been used to further inform recruitment in the trial. |
| Adverse events                                               | If the review provided information on adverse events and this has been used by the trial                                                                                                    |
| Justification of prevalence                                  | If the review justified the prevalence of the disease                                                                                                                                       |
| Choice of frequency/dose                                     | If the review provided information on choice of frequency/dose of the intervention and that was used by the trial to determine the right frequency/dose                                     |
| Estimating the difference to detect or margin of equivalence | If the review provided information on effect size and this information has been used by the trial to estimate the effect size                                                               |
| Estimating the control group event rate                      | If the review provided information on control event rate and the trial used this information                                                                                                |

|                            |                                                                                                                                                                                            |
|----------------------------|--------------------------------------------------------------------------------------------------------------------------------------------------------------------------------------------|
|                            | to make an estimate of the control group event rate.                                                                                                                                       |
| Intensity of interventions | If the review identified that the intensity of intervention was not adequate and the trial used the information to determine the intensity of interventions                                |
| Duration of follow-up      | If the review provided information on duration of follow-up (short term or long term) and if that information was used in the trial design to determine the required duration of follow-up |
| Withdrawal rate            | If the review provided information on the withdrawal or drop-out rate and if this was used to inform the trial                                                                             |
